# Supplementary material
Source: Research Square preprint supplement (doi:10.21203/rs.3.rs-10034548/v1)
Supplement: Supplementary file 1 [file d5d930a95ccba4788c95369d.docx]

**Supplementary Table. 1** Genotype names, codes, and pedigrees used in this experiment.

| **Genotype Code** | **Genotype Name** | **Species** | **Pedigree** |
| --- | --- | --- | --- |
| **G1** | UAS 446 | *Triticum durum* | DWR 185/ DWR2006/ UAS419 |
| **G2** | Amruth | *Triticum durum* | ANLC/ GAZA |
| **G3** | DWR-2006 | *Triticum durum* | SULA/ CREX/ AAZ |
| **G4** | AKDW-2997-16 | *Triticum durum* | CPAN6140/ RAJ1555 |
| **G5** | Bijaga yellow | *Triticum durum* | MYSORE LOCAL/ GAZA |
| **G6** | GDP 40 | - | - |
| **G7** | UAS-428 | *Triticum durum* | GREEN-14/ YAV-10/ AUK/ UAS402 |
| **G8** | UAS-347 | *Triticum aestivum* | E#5/ 5/ KAUZ/ 6/ FRET2YDWR162 |
| **G9** | UAS-375 | *Triticum aestivum* | UAS 320/ GW 322// LOK |
| **G10** | HD-2888 | *Triticum aestivum* | C306/ *T. spaerococcum* // HW 2004 |
| **G11** | UAS-334 |  | CPAN6140/RAJ1555 |
| **G12** | UAS-3020 | *Triticum aestivum* | UAS 320 X (QUAIU#3//MILAN/AMSEL) |
| **G13** | UASBW 11421 | *Triticum aestivum* | ZAKA/3/AJAIA_12/F3LOCAL (SEL.ETHIO.135.85) //PLATA_13/4/SOOTY_9/RASCON_37//WODUCK/CHAM_3/5/SOOTY_9/RASCON_37//GUAYACAN INIA/3/BSET/PNIO_3/4/PLATA_7/ILBOR_1//SOMAT_3/3/OUET_1/8/BZEL/CALAMON_1//TEJE_1/7/DON JESUS/6/CHEN/ALTAR 84/3/HUI/POC//BUB/RUFO/4/FNF |
| **G14** | UASBW 12982 | *Triticum aestivum* | TARRO_1/2*YUAN_1//AJAIA_13/YAZI/3/ZAMP_2/4/CANELO_8//SORA/2*PLATA_12/5/CBC 501 CHILE/GUANAY//GAUK_5/7/ALTAR 84/BINTEPE 85/3/STOT//ALTAR 84/ALD/4/POD_11/YAZI_1/5/VANRRIKSE_12/SNITAN/6/SOOTY_9/RASCON_37//WODUCK/CHAM_3/8/GUAYACAN INIA/2*SNITAN/3/SOMAT_3 |
| **G15** | UASBW 13039 (UASD 22-5) | *Triticum aestivum* | LOK-62 X (BOW/VEE /5/ND/VG9144 //KAL/BB/3 /YACO/4/CHIL/6/CASKOR/3/CROC_1 /AE. SQUARROSA (224) //OPATA/7/PASTOR // MILAN/KAUZ/3/BAV92) |
| **G16** | UASBW 12380 | *Triticum aestivum* | MUNAL #1*2//SOKOLL/WBLL1 |
| **G17** | UASDW 30805 | *Triticum durum* | SOOTY_9/RASCON_37//GUAYACAN INIA/4/BCRIS/BICUM//LLARETA INIA/3/DUKEM_12/2*RASCON_21/9/CBC 509 CHILE/6/ECO/CMH76A.722//BIT/3/ALTAR 84/4/AJAIA_2/5/KJOVE_1/7/AJAIA_12/F3LOCAL (SEL.ETHIO.135.85) //PLATA_13/8/SOOTY_9/RASCON_37//WODUCK/CHAM_3 |
| **G18** | UASDW 31156 | *Triticum durum* | BYBLOS/6/PLATA_6/GREEN_17/3/CHEN/AUK//BISU*2/5/PLATA_3//CREX/ALLA/3/SOMBRA_20/4/SILVER_14/MOEWE/9/CBC 509 CHILE/6/ECO/CMH76A.722//BIT/3/ALTAR 84/4/AJAIA_2/5/KJOVE_1/7/AJAIA_12/F3LOCAL (SEL.ETHIO.135.85) //PLATA_13/8/SOOTY_9/RASCON_37//WODUCK/CHAM_3 |
| **G19** | UASDW 30820 | *Triticum durum* | BD00088.504/4/GUAYACAN INIA/GUANAY//PORRON_4/BEJAH_7/3/VANRRIKSE_12/SNITAN/5/D04340B/CIRNO C 2008 |
| **G20** | UASDW31138 | *Triticum durum* | INIA/3/DUKEM_12/2*RASCON_21/9/CBC 509 CHILE/6/ECO/CMH76A.722//BIT/3/ALTAR 84/4/AJAIA_2/5/KJOVE_1/7/AJAIA_12/F3LOCAL (SEL.ETHIO.135.85) //PLATA_13/8/SOOTY_9/RASCON_37//WODUCK/CHAM_3 |

| **Genotypes** | **Y** | **nY** | **S⁽¹⁾** | **nS⁽¹⁾** | **S⁽²⁾** | **nS⁽²⁾** | **S⁽³⁾** | **nS⁽³⁾** | **S⁽⁶⁾** | **nS⁽⁶⁾** |
| --- | --- | --- | --- | --- | --- | --- | --- | --- | --- | --- |
| **G1** | 1643.00 | 16 | 2.40 | 3 | 3.70 | 3 | 1.90 | 3 | 0.92 | 3 |
| **G2** | 1150.40 | 20 | 0.40 | 1 | 0.20 | 1 | 0.67 | 1 | 1.33 | 6 |
| **G3** | 1845.20 | 10 | 5.20 | 10 | 17.30 | 9 | 6.07 | 8 | 1.37 | 7 |
| **G4** | 1707.20 | 13 | 9.40 | 20 | 60.80 | 20 | 22.94 | 20 | 3.06 | 19 |
| **G5** | 1547.80 | 19 | 3.80 | 6 | 9.30 | 6 | 6.64 | 10 | 2.21 | 16 |
| **G6** | 2097.00 | 2 | 2.20 | 2 | 3.70 | 2 | 0.91 | 2 | 0.42 | 1 |
| **G7** | 1756.60 | 12 | 7.40 | 16 | 37.50 | 17 | 16.67 | 18 | 2.89 | 18 |
| **G8** | 1849.40 | 9 | 6.00 | 11 | 23.70 | 11 | 8.03 | 11 | 1.59 | 9 |
| **G9** | 1775.00 | 11 | 7.40 | 16 | 35.70 | 16 | 12.75 | 16 | 2.07 | 15 |
| **G10** | 2008.60 | 5 | 6.80 | 14 | 32.50 | 14 | 9.29 | 12 | 1.71 | 12 |
| **G11** | 2013.00 | 4 | 8.40 | 19 | 51.30 | 19 | 15.31 | 17 | 1.82 | 13 |
| **G12** | 1613.00 | 17 | 7.20 | 15 | 40.20 | 18 | 20.62 | 19 | 3.18 | 20 |
| **G13** | 1671.60 | 15 | 3.80 | 6 | 12.70 | 7 | 6.51 | 9 | 1.59 | 8 |
| **G14** | 2186.80 | 1 | 4.40 | 8 | 14.20 | 8 | 3.38 | 5 | 0.90 | 2 |
| **G15** | 2042.80 | 3 | 5.00 | 9 | 19.00 | 10 | 5.07 | 7 | 0.93 | 5 |
| **G16** | 1910.80 | 7 | 3.60 | 5 | 8.50 | 5 | 2.62 | 4 | 0.92 | 3 |
| **G17** | 1552.40 | 18 | 2.60 | 4 | 5.50 | 4 | 4.40 | 6 | 1.60 | 10 |
| **G18** | 1920.80 | 6 | 7.40 | 16 | 34.50 | 15 | 11.50 | 14 | 1.83 | 14 |
| **G19** | 1894.20 | 8 | 6.40 | 12 | 27.70 | 12 | 9.89 | 13 | 1.68 | 11 |
| **G20** | 1702.80 | 14 | 6.60 | 13 | 28.70 | 13 | 12.48 | 15 | 2.26 | 17 |

**Supplementary Table. 2** Mean yield and various non parametric measures of stability along with their ranks for twenty wheat genotypes tested in five environments under drought regime

**Y*-*** Yield (kg/ha), ***S (1,)*** ***S (2,)*** ***S (3),*** ***S (6) -*** Huhn’s and Nassar and Huhn’s non-parametric statistics

**Table. 2 Conti,,,,**

***NP (1,)*** ***NP (2,) NP (3), NP (4) -*** Thennarasu’s non-parametric statistics, **𝘒R**- Kang’s rank-sum

| **Genotypes** | **NP⁽¹⁾** | **nNP⁽¹⁾** | **NP⁽²⁾** | **nNP⁽²⁾** | **NP⁽³⁾** | **nNP⁽³⁾** | **NP⁽⁴⁾** | **nNP⁽⁴⁾** | **𝘒R** | **n𝘒R** |
| --- | --- | --- | --- | --- | --- | --- | --- | --- | --- | --- |
| **G1** | 2.20 | 1 | 0.47 | 13 | 0.34 | 3 | 0.31 | 4 | 17.00 | 6 |
| **G2** | 4.00 | 4 | 11.80 | 20 | 4.55 | 20 | 0.33 | 5 | 38.00 | 20 |
| **G3** | 4.80 | 10 | 0.29 | 7 | 0.48 | 8 | 0.46 | 7 | 16.00 | 5 |
| **G4** | 8.20 | 19 | 0.52 | 14 | 0.73 | 15 | 0.89 | 19 | 33.00 | 18 |
| **G5** | 5.40 | 12 | 1.30 | 18 | 0.91 | 19 | 0.68 | 16 | 26.00 | 16 |
| **G6** | 4.60 | 8 | 0.15 | 2 | 0.33 | 2 | 0.14 | 1 | 7.00 | 1 |
| **G7** | 6.20 | 16 | 0.69 | 16 | 0.78 | 17 | 0.82 | 18 | 29.00 | 17 |
| **G8** | 4.40 | 7 | 0.27 | 6 | 0.45 | 7 | 0.51 | 10 | 19.00 | 9 |
| **G9** | 4.60 | 8 | 0.33 | 11 | 0.52 | 12 | 0.66 | 15 | 24.00 | 14 |
| **G10** | 6.20 | 16 | 0.23 | 4 | 0.49 | 9 | 0.49 | 8 | 19.00 | 9 |
| **G11** | 8.80 | 20 | 0.32 | 9 | 0.56 | 13 | 0.63 | 14 | 23.00 | 13 |
| **G12** | 7.20 | 18 | 0.84 | 17 | 0.86 | 18 | 0.92 | 20 | 33.00 | 18 |
| **G13** | 2.20 | 1 | 0.37 | 12 | 0.45 | 6 | 0.49 | 9 | 18.00 | 8 |
| **G14** | 5.40 | 12 | 0.17 | 3 | 0.37 | 5 | 0.26 | 2 | 13.00 | 4 |
| **G15** | 4.20 | 5 | 0.33 | 10 | 0.36 | 4 | 0.33 | 5 | 11.00 | 2 |
| **G16** | 4.20 | 5 | 0.15 | 1 | 0.31 | 1 | 0.28 | 3 | 11.00 | 2 |
| **G17** | 3.60 | 3 | 1.80 | 19 | 0.75 | 16 | 0.52 | 11 | 20.00 | 11 |
| **G18** | 5.40 | 12 | 0.31 | 8 | 0.51 | 11 | 0.62 | 13 | 21.00 | 12 |
| **G19** | 5.20 | 11 | 0.27 | 5 | 0.50 | 10 | 0.57 | 12 | 17.00 | 6 |
| **G20** | 5.80 | 15 | 0.56 | 15 | 0.62 | 14 | 0.72 | 17 | 25.00 | 15 |

**Supplementary Table. 3** Mean yield and various parametric measures of stability along with their ranks for twenty wheat genotypes tested in five environments under drought regime

| **Genotype** | **Y** | **nY** | **θᵢ** | **nθᵢ** | **θ₍ᵢ₎** | **nθ₍ᵢ₎** | **Wᵢ²** | **Wᵢ²** | **σ²ᵢ** | **nσ²ᵢ** | **s²dᵢ** | **ns²dᵢ** | **CVi** | **nCVi** |
| --- | --- | --- | --- | --- | --- | --- | --- | --- | --- | --- | --- | --- | --- | --- |
| **G1** | 1643.00 | 16 | 48109.140 | 20 | 92039.08 | 1 | 15045.08 | 1 | -676.55 | 1 | 1842.82 | 1 | 29.23 | 7 |
| **G2** | 1150.40 | 20 | 116691.70 | 3 | 84418.80 | 18 | 536272.36 | 18 | 144108.81 | 18 | 57992.45 | 18 | 39.22 | 18 |
| **G3** | 1845.20 | 10 | 65692.06 | 15 | 90085.42 | 6 | 148675.32 | 6 | 36442.96 | 6 | 20717.17 | 8 | 30.53 | 9 |
| **G4** | 1707.20 | 13 | 207934.20 | 1 | 74280.75 | 20 | 1229715.22 | 20 | 336731.82 | 20 | 39533.33 | 13 | 15.42 | 1 |
| **G5** | 1547.80 | 19 | 67229.43 | 14 | 89914.60 | 7 | 160359.34 | 7 | 39688.52 | 7 | 19410.33 | 7 | 29.74 | 8 |
| **G6** | 2097.00 | 2 | 64272.25 | 16 | 90243.18 | 5 | 137884.78 | 5 | 33445.59 | 5 | 15991.03 | 4 | 28.81 | 6 |
| **G7** | 1756.60 | 12 | 109300.70 | 4 | 85240.02 | 17 | 480101.00 | 17 | 128505.65 | 17 | 64754.37 | 19 | 30.56 | 10 |
| **G8** | 1849.40 | 9 | 83926.11 | 11 | 88059.42 | 10 | 287254.06 | 10 | 74937.06 | 10 | 32322.61 | 12 | 36.08 | 15 |
| **G9** | 1775.00 | 11 | 90198.92 | 8 | 87362.44 | 13 | 334927.48 | 13 | 88179.67 | 13 | 47790.24 | 15 | 33.03 | 11 |
| **G10** | 2008.60 | 5 | 91059.65 | 7 | 87266.80 | 14 | 341469.00 | 14 | 89996.76 | 14 | 48652.38 | 16 | 28.18 | 4 |
| **G11** | 2013.00 | 4 | 149013.60 | 2 | 80827.47 | 19 | 781919.08 | 19 | 212344.01 | 19 | 97389.50 | 20 | 38.60 | 17 |
| **G12** | 1613.00 | 17 | 96416.85 | 5 | 86671.56 | 16 | 382183.68 | 16 | 101306.40 | 16 | 49795.66 | 17 | 41.00 | 19 |
| **G13** | 1671.60 | 15 | 56231.73 | 18 | 91136.57 | 3 | 76776.80 | 3 | 16471.15 | 3 | 7935.38 | 2 | 34.99 | 13 |
| **G14** | 2186.80 | 1 | 89574.39 | 9 | 87431.83 | 12 | 330181.04 | 12 | 86861.22 | 12 | 43549.42 | 14 | 23.00 | 3 |
| **G15** | 2042.80 | 3 | 79271.22 | 13 | 88576.63 | 8 | 251876.94 | 8 | 65110.08 | 8 | 16605.44 | 5 | 17.57 | 2 |
| **G16** | 1910.80 | 7 | 62924.38 | 17 | 90392.94 | 4 | 127640.94 | 4 | 30600.08 | 4 | 18040.48 | 6 | 28.68 | 5 |
| **G17** | 1552.40 | 18 | 55993.30 | 19 | 91163.06 | 2 | 74964.76 | 2 | 15967.81 | 2 | 10703.18 | 3 | 33.60 | 12 |
| **G18** | 1920.80 | 6 | 92880.30 | 6 | 87064.51 | 15 | 355305.94 | 15 | 93840.36 | 15 | 25402.30 | 10 | 38.59 | 16 |
| **G19** | 1894.20 | 8 | 83580.86 | 12 | 88097.78 | 9 | 284630.22 | 9 | 74208.21 | 9 | 28803.02 | 11 | 36.01 | 14 |
| **G20** | 1702.80 | 14 | 86322.63 | 10 | 87793.14 | 11 | 305467.64 | 11 | 79996.38 | 11 | 23599.38 | 9 | 42.09 | 20 |

**Y*-*** Yield (kg/ha)***,*** **θᵢ-** Mean variance component, **θ₍ᵢ₎-** GE variance component,***Wi2 -*** Wricke’s ecovalence, ***σ2i -*** Shukla’s stability variance, **s²dᵢ-** Deviation from regression, **CVi-** Coefficient of variation

**Supplementary Table. 4** Mean yield and various AMMI stability parameters along with their ranks for twenty wheat genotypes tested in five environments under drought regime

| **Genotype** | **Y** | **Y_R** | **ASI** | **ASI_R** | **ASTAB** | **ASTAB_R** | **AVAMGE** | **AVAMGE_R** | **DA** | **DA_R** | **DZ** | **DZ_R** | **FA** | **FA_R** |
| --- | --- | --- | --- | --- | --- | --- | --- | --- | --- | --- | --- | --- | --- | --- |
| **G1** | 1643.10 | 16 | 1.07 | 2 | 8.39 | 1 | 198.41 | 1 | 114.55 | 1 | 0.07 | 1 | 13121.99 | 1 |
| **G2** | 1150.60 | 20 | 6.81 | 19 | 337.87 | 18 | 1215.31 | 16 | 727.97 | 18 | 0.46 | 18 | 529940.06 | 18 |
| **G3** | 1844.90 | 10 | 2.37 | 8 | 63.84 | 6 | 609.35 | 7 | 302.05 | 6 | 0.21 | 6 | 91236.33 | 6 |
| **G4** | 1707.00 | 13 | 8.89 | 20 | 795.88 | 20 | 2222.67 | 20 | 1073.59 | 20 | 0.74 | 20 | 1152602.97 | 20 |
| **G5** | 1547.50 | 19 | 2.24 | 7 | 58.44 | 5 | 523.75 | 5 | 285.63 | 5 | 0.20 | 4 | 81582.48 | 5 |
| **G6** | 2096.90 | 2 | 0.54 | 1 | 51.53 | 3 | 477.97 | 2 | 249.10 | 2 | 0.21 | 5 | 62052.22 | 2 |
| **G7** | 1756.70 | 12 | 5.45 | 18 | 256.49 | 17 | 1255.52 | 17 | 620.14 | 17 | 0.41 | 15 | 384574.44 | 17 |
| **G8** | 1849.30 | 9 | 3.84 | 12 | 199.96 | 11 | 995.37 | 12 | 524.32 | 11 | 0.38 | 11 | 274915.19 | 11 |
| **G9** | 1774.90 | 11 | 2.56 | 9 | 183.34 | 9 | 917.56 | 9 | 485.50 | 8 | 0.38 | 9 | 235714.14 | 8 |
| **G10** | 2008.60 | 5 | 1.76 | 5 | 212.68 | 13 | 1026.67 | 13 | 511.01 | 10 | 0.42 | 16 | 261127.61 | 10 |
| **G11** | 2012.80 | 4 | 5.02 | 16 | 532.71 | 19 | 1626.74 | 19 | 838.26 | 19 | 0.64 | 19 | 702681.20 | 19 |
| **G12** | 1612.70 | 17 | 5.06 | 17 | 247.36 | 16 | 1263.64 | 18 | 599.87 | 16 | 0.41 | 14 | 359846.93 | 16 |
| **G13** | 1671.60 | 15 | 2.02 | 6 | 48.99 | 2 | 504.31 | 4 | 261.35 | 4 | 0.19 | 2 | 68303.76 | 4 |
| **G14** | 2186.70 | 1 | 4.80 | 14 | 212.24 | 12 | 1153.53 | 15 | 559.86 | 15 | 0.38 | 10 | 313442.77 | 15 |
| **G15** | 2043.10 | 3 | 3.00 | 10 | 190.84 | 10 | 815.75 | 8 | 498.66 | 9 | 0.38 | 12 | 248660.67 | 9 |
| **G16** | 1910.90 | 7 | 1.72 | 4 | 74.78 | 7 | 579.83 | 6 | 311.44 | 7 | 0.24 | 7 | 96996.31 | 7 |
| **G17** | 1552.10 | 18 | 1.51 | 3 | 52.12 | 4 | 488.10 | 3 | 260.49 | 3 | 0.20 | 3 | 67853.28 | 3 |
| **G18** | 1921.00 | 6 | 3.74 | 11 | 233.23 | 15 | 1095.55 | 14 | 559.30 | 14 | 0.42 | 17 | 312820.89 | 14 |
| **G19** | 1894.00 | 8 | 4.94 | 15 | 182.95 | 8 | 943.42 | 10 | 533.91 | 12 | 0.34 | 8 | 285063.36 | 12 |
| **G20** | 1702.70 | 14 | 3.91 | 13 | 213.51 | 14 | 989.05 | 11 | 540.03 | 13 | 0.40 | 13 | 291633.88 | 13 |

**ASI** (AMMI Stability Index), **AVAMGE** (Average Sum of the Absolute Value of the GEI Modeled by AMMI), **DA** (Distances Between Genotype and Environment Means), **DZ** (Distances Between Genotype and Interaction Principal Component Axes), **FA** (Fitted AMMI Model Value), **ASTAB** (AMMI-Based Stability Parameter)

**Table 4. *Conti..***

| **Genotype** | **MASI** | **MASI_R** | **MASV** | **MASV_R** | **SIPC** | **SIPC_R** | **ZA** | **ZA_R** |
| --- | --- | --- | --- | --- | --- | --- | --- | --- |
| **G1** | 1.07 | 1 | 3.68 | 1 | 3.60 | 1 | 0.03 | 1 |
| **G2** | 6.81 | 19 | 23.30 | 18 | 21.33 | 11 | 0.19 | 15 |
| **G3** | 2.56 | 7 | 9.56 | 6 | 13.07 | 6 | 0.10 | 7 |
| **G4** | 9.06 | 20 | 36.86 | 20 | 46.34 | 20 | 0.38 | 20 |
| **G5** | 2.24 | 5 | 10.54 | 7 | 7.97 | 2 | 0.06 | 3 |
| **G6** | 1.59 | 2 | 7.27 | 2 | 8.84 | 3 | 0.06 | 2 |
| **G7** | 5.49 | 17 | 20.80 | 16 | 24.94 | 17 | 0.21 | 18 |
| **G8** | 4.11 | 11 | 18.13 | 12 | 23.47 | 16 | 0.18 | 13 |
| **G9** | 3.53 | 9 | 14.80 | 8 | 21.35 | 12 | 0.16 | 11 |
| **G10** | 3.40 | 8 | 15.23 | 9 | 20.89 | 10 | 0.15 | 9 |
| **G11** | 6.39 | 18 | 25.51 | 19 | 35.54 | 19 | 0.27 | 19 |
| **G12** | 5.06 | 16 | 21.12 | 17 | 22.28 | 13 | 0.19 | 14 |
| **G13** | 2.06 | 4 | 9.41 | 4 | 10.39 | 4 | 0.08 | 4 |
| **G14** | 4.85 | 14 | 19.01 | 15 | 23.34 | 14 | 0.19 | 16 |
| **G15** | 3.59 | 10 | 16.87 | 10 | 20.38 | 9 | 0.15 | 8 |
| **G16** | 2.31 | 6 | 9.44 | 5 | 13.32 | 7 | 0.10 | 6 |
| **G17** | 1.91 | 3 | 8.33 | 3 | 12.04 | 5 | 0.09 | 5 |
| **G18** | 4.26 | 13 | 18.68 | 13 | 25.88 | 18 | 0.20 | 17 |
| **G19** | 4.97 | 15 | 17.04 | 11 | 16.75 | 8 | 0.15 | 10 |
| **G20** | 4.17 | 12 | 18.92 | 14 | 23.35 | 15 | 0.18 | 12 |

**MASV** (Modified AMMI Stability Value), **MASI** (Modified AMMI Stability Index), **SIPC** (Sum of the Absolute Value of IPC Scores), **Za** (Absolute Value of the Relative Contribution of IPCAs to the Interaction)

**Supplementary Table. 5** BLUP-based mean yield and ranking of twenty wheat genotypes evaluated in five environments under drought regime

| **Genotypes** | **AMGV** | | **HMGV** | | **HMRPGV** | | **RPGV** | |
| --- | --- | --- | --- | --- | --- | --- | --- | --- |
| **Score** | **RANK** | **Score** | **Rank** | **Score** | **Rank** | **Score** | **Rank** |
| **G1** | 1643.10 | 16 | 1519.53 | 14 | 0.91 | 14 | 0.91 | 16 |
| **G2** | 1150.60 | 20 | 993.61 | 20 | 0.60 | 20 | 0.64 | 20 |
| **G3** | 1844.90 | 10 | 1659.18 | 9 | 1.01 | 9 | 1.02 | 9 |
| **G4** | 1707.00 | 13 | 1673.77 | 8 | 0.93 | 13 | 1.01 | 11 |
| **G5** | 1547.50 | 19 | 1408.13 | 17 | 0.85 | 18 | 0.86 | 18 |
| **G6** | 2096.90 | 2 | 1908.42 | 3 | 1.15 | 2 | 1.16 | 3 |
| **G7** | 1756.70 | 12 | 1641.10 | 12 | 0.96 | 12 | 1.00 | 12 |
| **G8** | 1849.30 | 9 | 1641.73 | 11 | 1.00 | 10 | 1.01 | 10 |
| **G9** | 1774.90 | 11 | 1598.96 | 13 | 0.96 | 11 | 0.99 | 13 |
| **G10** | 2008.60 | 5 | 1884.61 | 4 | 1.11 | 4 | 1.13 | 4 |
| **G11** | 2012.80 | 4 | 1654.59 | 10 | 1.03 | 6 | 1.10 | 5 |
| **G12** | 1612.70 | 17 | 1400.51 | 19 | 0.86 | 17 | 0.88 | 17 |
| **G13** | 1671.60 | 15 | 1496.03 | 15 | 0.91 | 15 | 0.92 | 15 |
| **G14** | **2186.70** | **1** | **2105.37** | **1** | **1.22** | **1** | **1.25** | **1** |
| **G15** | 2043.10 | 3 | 1996.46 | 2 | 1.15 | 3 | 1.18 | 2 |
| **G16** | 1910.90 | 7 | 1792.40 | 5 | 1.06 | 5 | 1.07 | 6 |
| **G17** | 1552.10 | 18 | 1407.14 | 18 | 0.85 | 19 | 0.86 | 19 |
| **G18** | 1921.00 | 6 | 1675.85 | 7 | 1.03 | 7 | 1.05 | 7 |
| **G19** | 1894.00 | 8 | 1695.30 | 6 | 1.03 | 8 | 1.04 | 8 |
| **G20** | 1702.70 | 14 | 1464.83 | 16 | 0.90 | 16 | 0.92 | 14 |

**Supplementary Table. 6** Ranking of twenty genotypes based on FAI-BLUP, MTSI and MGIDIBottom of Form

| **Genotype** | **FAI-BLUP Score** | **FAI Rank** | **MGIDI Score** | **MGIDI Rank** | **MTSI Score** | **MTSI Rank** |
| --- | --- | --- | --- | --- | --- | --- |
| G1 | 0.5574 | 18 | 4.321 | 16 | 5.005 | 4 |
| G2 | 0.4852 | 20 | 6.363 | 20 | 7.675 | 19 |
| G3 | 0.8193 | 5 | 2.596 | 1 | 4.821 | 3 |
| G4 | 0.6362 | 13 | 4.578 | 17 | 7.468 | 18 |
| G5 | 0.9142 | 2 | 2.733 | 3 | 7.031 | 15 |
| G6 | 0.7648 | 6 | 4.257 | 15 | 5.120 | 5 |
| G7 | 0.5387 | 19 | 5.020 | 18 | 7.828 | 20 |
| G8 | 0.7005 | 10 | 3.823 | 10 | 4.425 | 1 |
| G9 | 0.5936 | 17 | 5.021 | 19 | 6.595 | 12 |
| G10 | 0.7075 | 9 | 3.390 | 8 | 7.126 | 16 |
| G11 | 0.8412 | 4 | 2.930 | 5 | 7.186 | 17 |
| G12 | 0.6261 | 14 | 4.111 | 13 | 5.569 | 9 |
| G13 | 0.6048 | 16 | 3.997 | 12 | 5.359 | 7 |
| G14 | 0.8695 | 3 | 2.976 | 6 | 6.036 | 11 |
| G15 | 1.0678 | 1 | 2.658 | 2 | 4.623 | 2 |
| G16 | 0.7220 | 8 | 3.894 | 11 | 5.984 | 10 |
| G17 | 0.6158 | 15 | 4.122 | 14 | 6.847 | 14 |
| G18 | 0.6766 | 11 | 3.294 | 7 | 5.238 | 6 |
| G19 | 0.7375 | 7 | 2.851 | 4 | 5.448 | 8 |
| G20 | 0.6543 | 12 | 3.542 | 9 | 6.661 | 13 |

| **Parametric**  **Supplementary Table. 7** Comparison of genotype rankings based on weighted rank aggregation (WRA) across parametric, non-parametric, AMMI, BLUP, and multi-trait analytical approaches | | | **Non-parametric** | | | **AMMI** | | | **BLUP** | | | **Multi-trait** | | |
| --- | --- | --- | --- | --- | --- | --- | --- | --- | --- | --- | --- | --- | --- | --- |
| **Genotype** | **WRA** | **Rank** | **Genotype** | **WRA** | **Rank** | **Genotype** | **WRA** | **Rank** | **Genotype** | **WRA** | **Rank** | **Genotype** | **WRA** | **Rank** |
| G6 | 3.88 | 1 | G6 | 2.98 | 1 | G6 | 3.42 | 1 | G14 | 1.00 | 1 | G15 | 1.71 | 1 |
| G16 | 4.52 | 2 | G16 | 3.84 | 2 | G13 | 4.18 | 2 | G15 | 2.38 | 2 | G3 | 3.21 | 2 |
| G15 | 4.74 | 3 | G15 | 4.12 | 3 | G17 | 4.36 | 3 | G6 | 2.62 | 3 | G8 | 5.96 | 3 |
| G14 | 5.31 | 4 | G14 | 4.75 | 4 | G1 | 4.91 | 4 | G10 | 4.31 | 4 | G19 | 6.50 | 4 |
| G10 | 5.84 | 5 | G3 | 5.68 | 5 | G5 | 5.27 | 5 | G16 | 5.54 | 5 | G5 | 8.04 | 5 |
| G3 | 6.42 | 6 | G8 | 6.21 | 6 | G16 | 6.02 | 6 | G18 | 6.85 | 6 | G18 | 7.94 | 6 |
| G19 | 7.05 | 7 | G10 | 6.44 | 7 | G3 | 6.45 | 7 | G19 | 7.23 | 7 | G6 | 8.06 | 7 |
| G18 | 7.28 | 8 | G19 | 6.73 | 8 | G18 | 7.38 | 8 | G11 | 6.77 | 8 | G10 | 11.43 | 8 |
| G8 | 7.64 | 9 | G18 | 7.02 | 9 | G19 | 7.64 | 9 | G3 | 9.23 | 9 | G14 | 6.63 | 9 |
| G9 | 7.89 | 10 | G13 | 7.28 | 10 | G10 | 7.81 | 10 | G8 | 10.08 | 10 | G11 | 10.42 | 10 |
| G13 | 8.12 | 11 | G9 | 7.56 | 11 | G8 | 8.22 | 11 | G4 | 10.92 | 11 | G16 | 9.83 | 11 |
| G5 | 8.44 | 12 | G5 | 7.84 | 12 | G9 | 8.47 | 12 | G7 | 12.00 | 12 | G12 | 11.83 | 12 |
| G1 | 8.71 | 13 | G1 | 8.10 | 13 | G20 | 9.15 | 13 | G9 | 12.15 | 13 | G13 | 11.72 | 13 |
| G20 | 9.15 | 14 | G17 | 8.62 | 14 | G15 | 9.33 | 14 | G20 | 15.23 | 14 | G20 | 11.87 | 14 |
| G7 | 9.82 | 15 | G20 | 8.94 | 15 | G14 | 9.87 | 15 | G13 | 15.00 | 15 | G17 | 14.43 | 15 |
| G4 | 10.36 | 16 | G7 | 9.28 | 16 | G7 | 10.92 | 16 | G1 | 14.92 | 16 | G4 | 16.57 | 16 |
| G12 | 10.92 | 17 | G4 | 10.15 | 17 | G12 | 11.35 | 17 | G12 | 17.85 | 17 | G9 | 15.96 | 17 |
|  |  |  |  |  |  |  |  |  |  |  |  |  |  |  |
| G11 | 11.48 | 18 | G12 | 10.72 | 18 | G11 | 12.48 | 18 | G5 | 17.85 | 18 | G1 | 11.54 | 18 |
| G17 | 11.73 | 19 | G11 | 11.36 | 19 | G2 | 13.72 | 19 | G17 | 18.62 | 19 | G2 | 19.55 | 19 |
| G2 | 12.85 | 20 | G2 | 12.88 | 20 | G4 | 14.10 | 20 | G2 | 20.00 | 20 | G7 | 19.41 | 20 |

**Supplementary Table. 8 Monthly meteorological data for the experiment across five environments**

| **Months** | **Dharwad-2023-2024** | | | **Bijapur 2023-2024** | | | **Bagalkot 2023-2024** | | | **Raichur 2023-2024** | | | **Dharwad-2024-2025** | | |
| --- | --- | --- | --- | --- | --- | --- | --- | --- | --- | --- | --- | --- | --- | --- | --- |
| **Rainfall** | **Min** | **Max** | **Rainfall** | **Min** | **Max** | **Rainfall** | **Min** | **Max** | **Rainfall** | **Min** | **Max** | **Rainfall** | **Min** | **Max** |
| **October** | 10.4 | 19.2 | 31.6 | 3.00 | 17.30 | 32.70 | 2 | 18.3 | 33.1 | 0 | 30.4 | 33.4 | 249.2 | 20.4 | 30.1 |
| **November** | 21 | 18.5 | 30.5 | 18.50 | 18.90 | 31.60 | 20 | 19.9 | 31.7 | 11.8 | 30.4 | 32.2 | 0.8 | 17.7 | 30.4 |
| **December** | 4.8 | 15.5 | 29.8 | 0.00 | 18.30 | 31.40 | 0 | 16.3 | 30.4 | 2.6 | 30.5 | 30.6 | 4.6 | 16.5 | 28.5 |
| **January** | 3.6 | 15.6 | 30.5 | 0.00 | 17.30 | 31.80 | 0 | 16.3 | 32 | 0 | 30.7 | 31.5 | 1.02 | 15.2 | 30.8 |
| **February** | 0 | 17 | 33.7 | 0.00 | 16.30 | 33.50 | 0 | 17.8 | 35.5 | 0 | 33.8 | 34.9 | 0 | 16.8 | 32.4 |
| **March** | 0.1 | 20.2 | 35.9 | 0.00 | 20.70 | 36.10 | 0 | 21.6 | 38.1 | 0 | 34.1 | 35.3 | 0.5 | 19.8 | 34.8 |
| **April** | 38.3 | 22 | 37.3 | 3.25 | 23.10 | 37.90 | 4.5 | 24.6 | 39.9 | 0 | 34.5 | 35.8 | 20 | 18 | 36.5 |

**Supplementary Table. 9 Moisture per cent in experimental plot**

| **Sl No** | **Date of soil sample collection** | **Moisture Per cent** |
| --- | --- | --- |
| **Dharwad 2023-2024** | | |
| 1 | 22nd November | 17.1 |
| 2 | 28th December | 16.5 |
| 3 | 16th January | 15.2 |
| 4 | 6th March | 12.1 |
| **Bijapur 2023-2024** | | |
| 1 | 27th November | 15.1 |
| 2 | 3rd January | 13.5 |
| 3 | 6th February | 11.7 |
| 4 | 14th March | 10.4 |
| **Bagalkot 2023-2024** | | |
| 1 | 26th November | 18.6 |
| 2 | January 2nd | 15.4 |
| 3 | 5th February | 14.9 |
| 4 | 12th March | 13.6 |
| **Raichur 2023-2024** | | |
| 1 | 22nd November | 16.1 |
| 2 | 28th December | 14.3 |
| 3 | 16th January | 12.7 |
| 4 | 6th March | 11.4 |
| **Dharwad 2024-2025** | | |
| 1 | 25th November | 18.1 |
| 2 | 20th December | 16.8 |
| 3 | 18th January | 14.2 |
| 4 | 15th March | 13.5 |
